# Supplementary material
Source: Springer Nature journal article supplement (https://www.springermedizin.de/resource/supplementary/13643_2013_166_MOESM2_ESM.pdf/9681418)

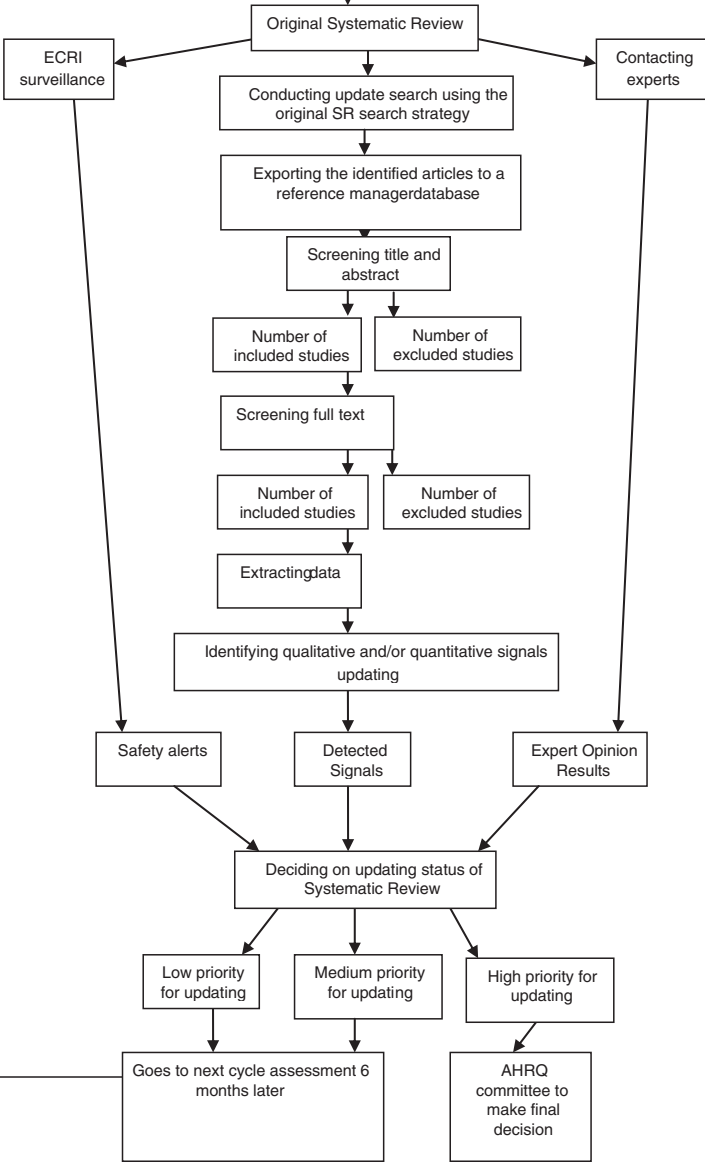

Supplement: MOESM2 [file 9681418]
